# Supplementary material for: Effects of molecular weight distribution on the self-assembly of end-functionalized polystyrenes
Source: Royal Society of Chemistry journal article supplement (doi:10.1039/c7py00803a), 2017-01-01
Supplement: c7py00803a1.pdf [file c7py00803a1.pdf]

# Electronic Supplementary Information (ESI)

## Effects of Molecular Weight Distribution on the Self-Assembly of End-Functionalized Polystyrenes

Bai-Heng Wu, Qi-Zhi Zhong, Zhi-Kang Xu, Ling-Shu Wan\*

MOE Key Laboratory of Macromolecular Synthesis and Functionalization, Department of  
Polymer Science and Engineering, Zhejiang University, Hangzhou 310027, China

\*Corresponding author. E-mail: [lswan@zju.edu.cn](mailto:lswan@zju.edu.cn); Tel: +86-571-87953763

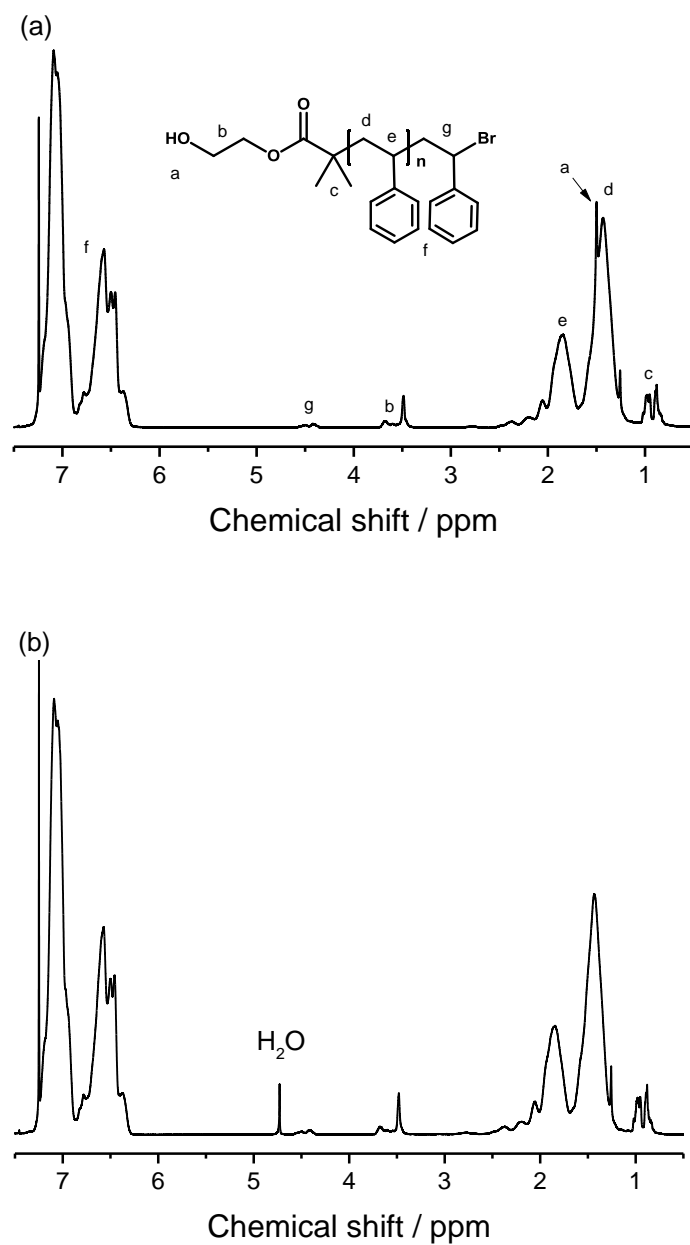

**Figure S1.** Typical  $^1\text{H}$  NMR spectra of **PS-1** (a) in  $\text{CDCl}_3$  and (b) after hydrogen-deuterium exchange in  $\text{CDCl}_3$  and  $\text{D}_2\text{O}$ .

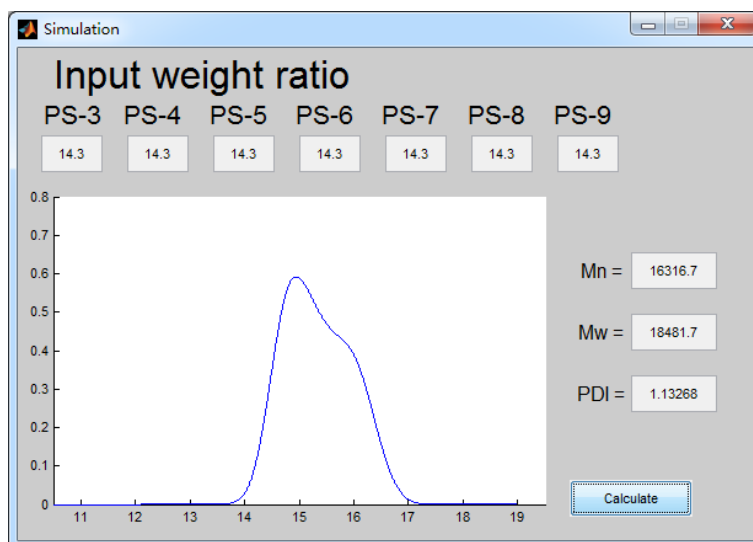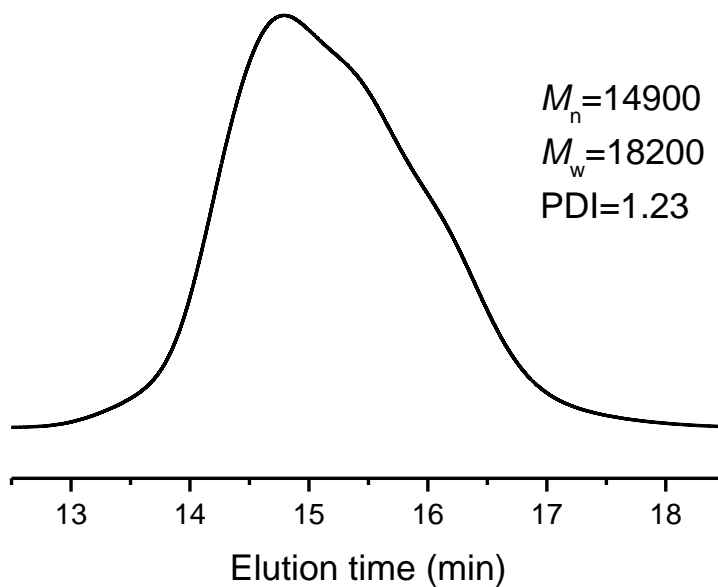

**Figure S2.** Molecular weight distribution (MWD) results of UNI-4 from theoretical calculation and GPC. On the basis of Gaussian function and GPC calibration curve, visual simulation application was set up by GUI of MATLAB.

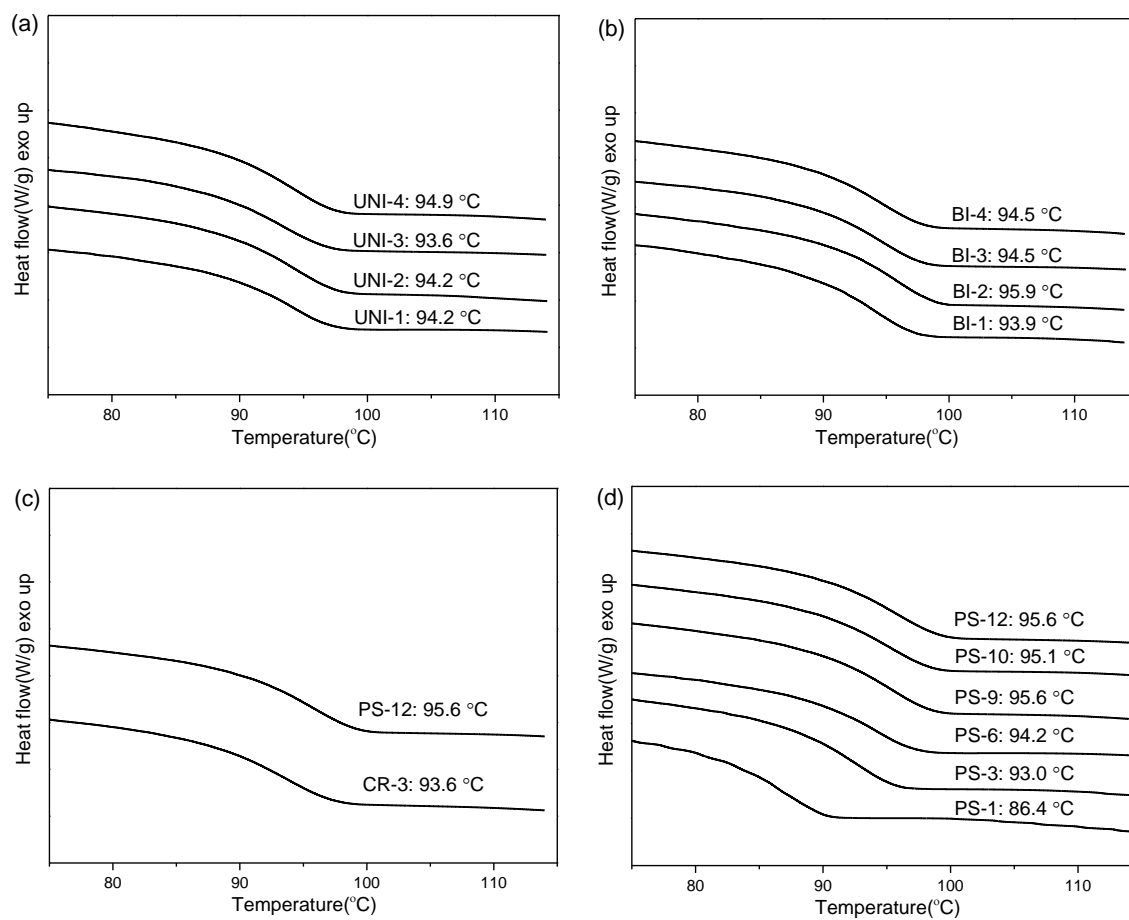

**Figure S3.** DSC curves of polystyrenes used in this work.

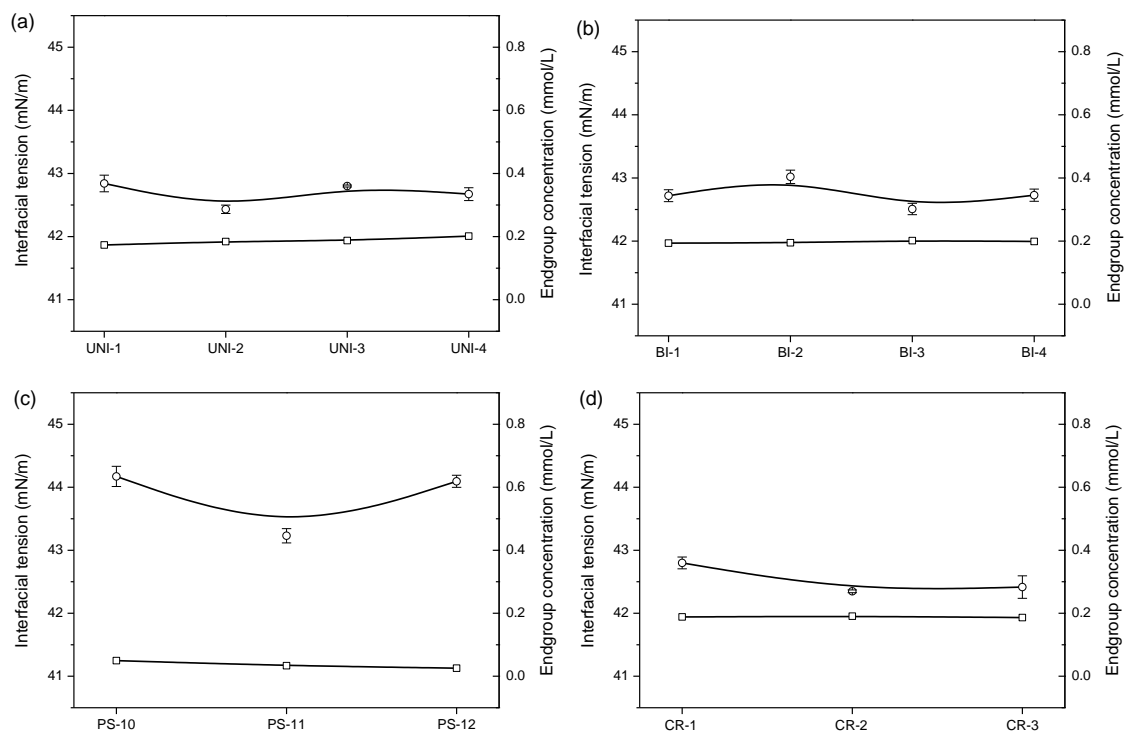

**Figure S4.** Interfacial tension (circle) measured by pendent drop method and end group concentration (square) of (a) UNI group, (b) BI group, (c) synthetic unimodal distributed samples and (d) CR group.

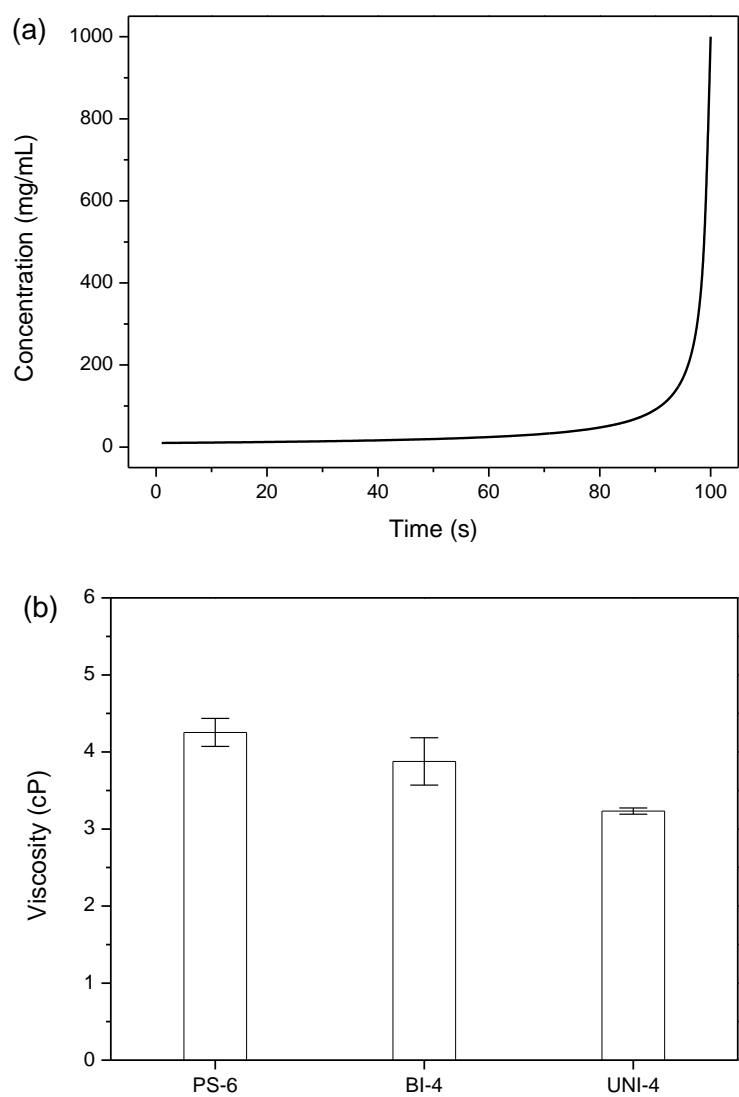

**Figure S5.** (a) Concentration variation with the evaporation of solvent during the breath figure process. (b) Viscosities of different polymer solutions measured at 200 mg/mL. The shear rate is 50 rpm.

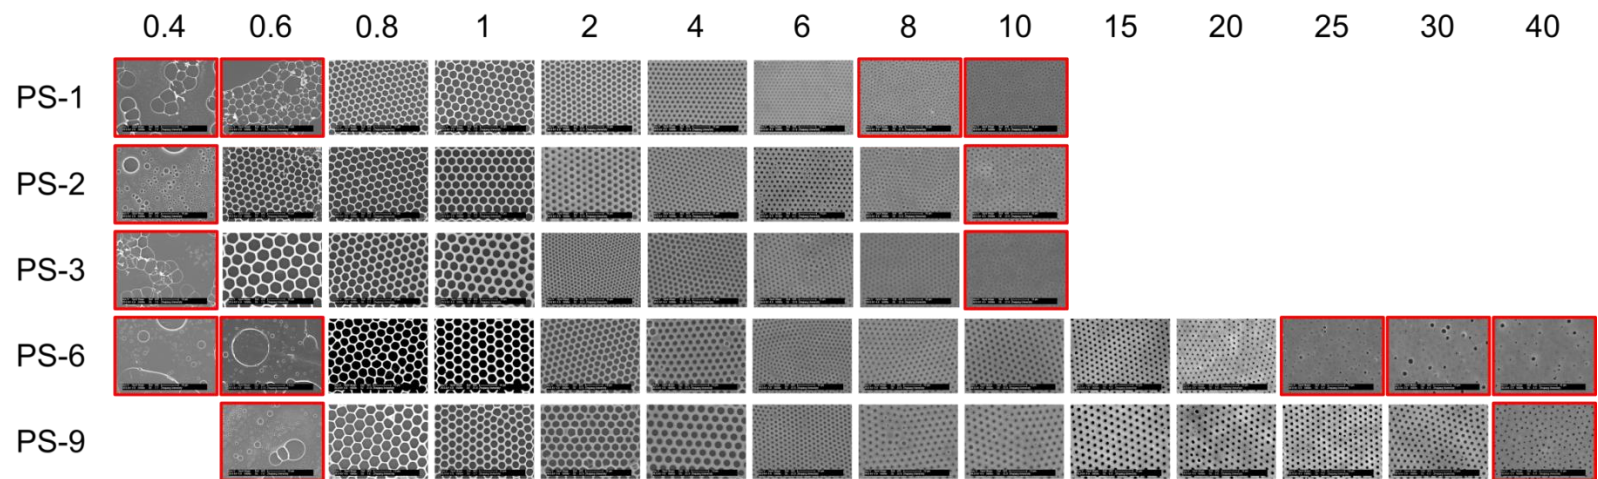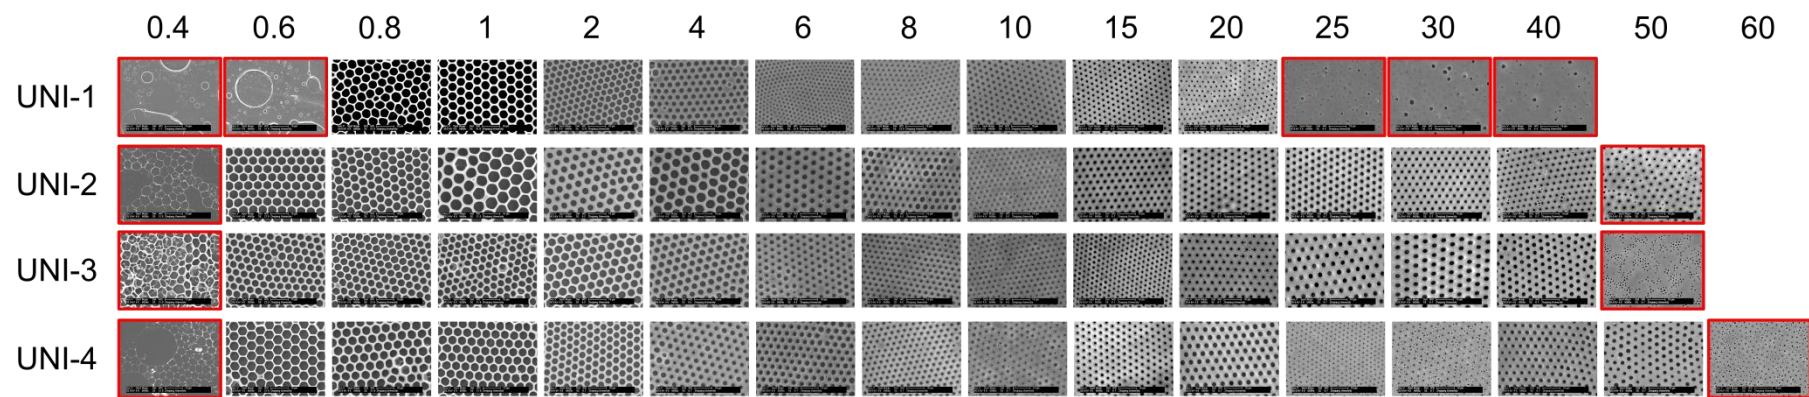

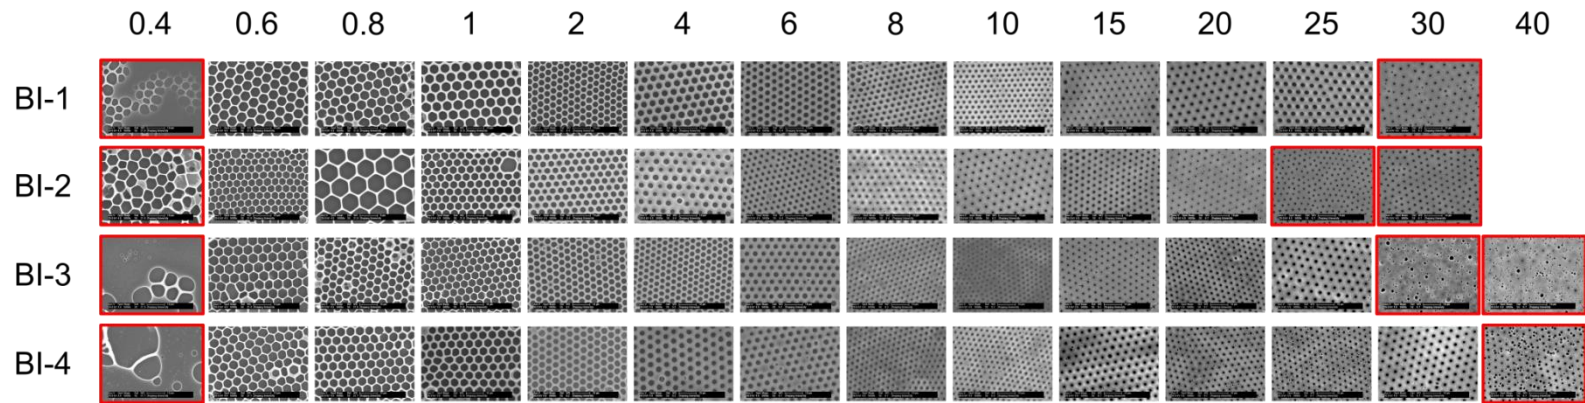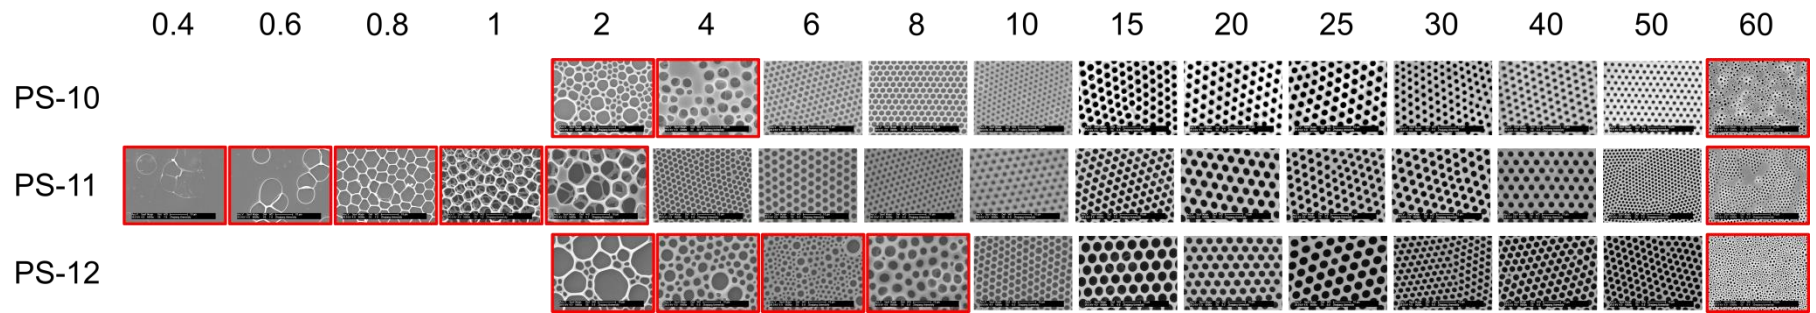



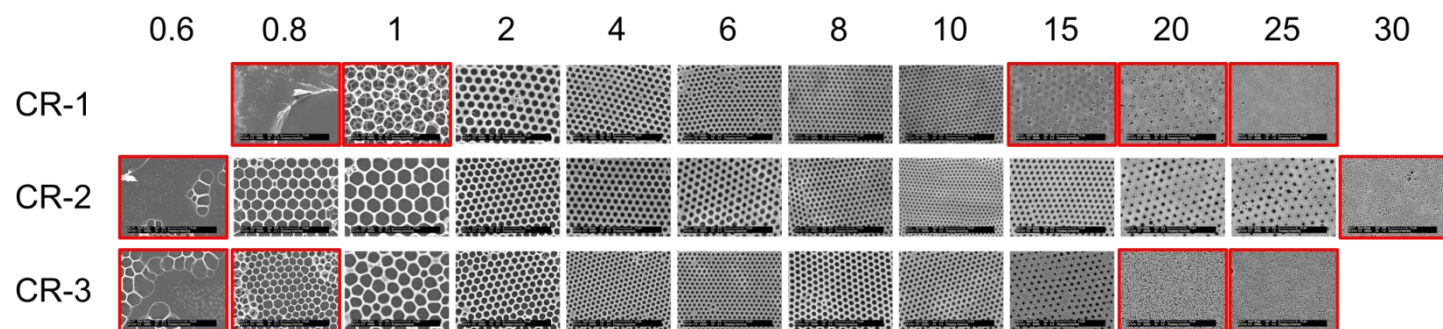

**Figure S6.** SEM images of films prepared from polystyrenes with different molecular weights and MWD at various concentrations. Images with border lines denote disordered samples.
